# Supplementary material for: Volatile Organic Compound Sampling through Rotor Unmanned Aerial Vehicle Technique for Environmental Monitoring
Source: MDPI journal article supplement (doi:10.3390/atmos13091442), 2022-09-06
Supplement: s1 [file s1]

**Table S1 Calibration of each VOC species**

| serial<br>num<br>ber | Chemical name                 | Quant<br>itative<br>ion<br>m/z | Linearly<br>coefficient R |            | serial<br>numb<br>er | Chemical name                        | Quantitat<br>ive ion<br>m/z | Linearly<br>coefficient R |        |
|----------------------|-------------------------------|--------------------------------|---------------------------|------------|----------------------|--------------------------------------|-----------------------------|---------------------------|--------|
|                      |                               |                                | (A)                       | (B)        |                      |                                      |                             | (A)                       | (B)    |
| 1                    | Ethylene                      | /                              | 0.999<br>9                | /          | 60                   | cyclohexane                          | 84                          | 0.999<br>8                | 0.9987 |
| 2                    | Acetylene                     | /                              | 0.999<br>9                | /          | 61                   | 2-methylhexane                       | 43                          | 0.999<br>7                | 0.9988 |
| 3                    | Ethane                        | /                              | 0.999<br>8                | /          | 62                   | 2, 3-<br>dimethylpentane             | 56                          | 0.999<br>9                | 0.9993 |
| 4                    | Propylene                     | 41                             | 0.999<br>5                | /          | 63                   | Amyl aldehyde                        | 44                          | 0.998<br>6                | 0.9982 |
| 5                    | Propane                       | 29                             | 0.999<br>7                | 0.999<br>4 | 64                   | 3-methylhexane                       | 43                          | 0.997<br>1                | 0.9989 |
| 6                    | Difluorodichlor<br>omethane   | 85                             | 0.999<br>9                | 0.997<br>6 | 65                   | 1, 2-<br>dichloropropane             | 63                          | 0.999<br>9                | 0.9991 |
| 7                    | Chloromethane                 | 50                             | 0.999<br>8                | 0.996<br>2 | 66                   | Monobromodichl<br>oromethane         | 83                          | 0.999<br>7                | 0.9991 |
| 8                    | Acetaldehyde                  | 29                             | 0.999<br>0                | 0.996<br>1 | 67                   | 1, 4-dioxane                         | 88                          | 0.996<br>7                | 0.9983 |
| 9                    | Isobutane                     | 43                             | 0.999<br>7                | 0.995<br>2 | 68                   | trichloroethylene                    | 130                         | 0.999<br>7                | 0.9997 |
| 10                   | Tetrafluorodich<br>loroethane | 85                             | 0.999<br>7                | 0.997<br>7 | 69                   | 2,2, 4-<br>trimethylpentane          | 57                          | 0.999<br>9                | 0.9991 |
| 11                   | Vinyl chloride                | 62                             | 0.999<br>7                | 0.996<br>6 | 70                   | Methyl<br>methacrylate               | 69                          | 0.998<br>9                | 0.9987 |
| 12                   | 1 - butylene                  | 41                             | 0.999<br>5                | 0.995<br>6 | 71                   | n-heptane                            | 71                          | 0.999<br>9                | 0.9993 |
| 13                   | 1, 3 - butadiene              | 54                             | 0.999<br>1                | 0.997<br>6 | 72                   | Cis-1, 3-<br>dichloro-1-<br>propene  | 75                          | 0.998<br>3                | 0.9987 |
| 14                   | N-butane                      | 43                             | 0.999<br>6                | 0.998<br>1 | 73                   | 4-methyl-2-<br>pentanone             | 58                          | 0.997<br>7                | 0.9971 |
| 15                   | Trans-but-2-<br>ene           | 41                             | 0.999<br>4                | 0.996<br>5 | 74                   | 1, 1-<br>dibromoethane               | 107                         | 0.999<br>8                | 0.9988 |
| 16                   | Methyl<br>bromide             | 94                             | 0.999<br>7                | 0.999<br>3 | 75                   | Methylcyclohexa<br>ne                | 83                          | 0.999<br>8                | 0.9957 |
| 17                   | cis-but-2-ene                 | 41                             | 0.998<br>6                | 0.997<br>8 | 76                   | Tran-1, 3-<br>dichloro-1-<br>propene | 75                          | 0.995<br>8                | 0.9984 |
| 18                   | Chloroethane                  | 64                             | 0.999<br>6                | 0.998<br>9 | 77                   | 1,1, 2-<br>trichloroethane           | 97                          | 0.999<br>8                | 0.9992 |

|    |                                   |     |            |            |       |                             |     |            |        |
|----|-----------------------------------|-----|------------|------------|-------|-----------------------------|-----|------------|--------|
| 19 | Ethanol                           | 31  | 0.999<br>1 | 0.996<br>5 | 78    | 2,3, 4-<br>trimethylpentane | 71  | 0.999<br>4 | 0.9991 |
| 20 | Acrolein                          | 56  | 0.998<br>9 | 0.997<br>9 | 79    | Toluene                     | 91  | 0.999<br>9 | 0.9992 |
| 21 | Acetone                           | 43  | 0.999<br>7 | 0.997<br>4 | 80    | 2-methylheptane             | 57  | 0.999<br>8 | 0.9992 |
| 22 | Propanal                          | 29  | 0.999<br>5 | 0.996<br>0 | 81    | 2 - hexanone                | 43  | 0.994<br>6 | 0.9977 |
| 23 | Isopentane                        | 57  | 0.997<br>4 | 0.997<br>7 | 82    | 3-methylheptane             | 85  | 0.999<br>7 | 0.9989 |
| 24 | Monofluorotri-<br>chloromethane   | 101 | 0.999<br>6 | 0.999<br>0 | 83    | Hexanal                     | 56  | 0.997<br>6 | 0.9957 |
| 25 | Isopropyl<br>alcohol              | 45  | 0.998<br>6 | 0.996<br>9 | 84    | Dibromochlorom-<br>ethane   | 129 | 0.999<br>5 | 0.9988 |
| 26 | 1 - amylene                       | 55  | 0.997<br>1 | 0.998<br>3 | 85    | 1, 2-<br>dibromoethane      | 107 | 0.999<br>6 | 0.9989 |
| 27 | Isopentane                        | 43  | 0.998<br>6 | 0.998<br>3 | 86    | Octane                      | 43  | 0.999<br>7 | 0.9983 |
| 28 | Isoprene                          | 67  | 0.998<br>5 | 0.999<br>0 | 87    | Tetrachloroethyle-<br>ne    | 166 | 0.999<br>7 | 0.9996 |
| 29 | Tr-2-pentene                      | 55  | 0.999<br>5 | 0.998<br>6 | 88    | Chlorobenzene               | 112 | 0.999<br>9 | 0.9995 |
| 30 | 1, 1-<br>dichloroethylen-<br>e    | 61  | 0.999<br>3 | 0.998<br>1 | 89    | Ethyl benzene               | 91  | 0.999<br>9 | 0.9994 |
| 31 | cis-2-pentene                     | 55  | 0.999<br>4 | 0.998<br>6 | 90/91 | M/p-xylene                  | 91  | 0.999<br>9 | 0.9993 |
| 32 | Methylene<br>chloride             | 84  | 0.999<br>7 | 0.998<br>3 | 92    | Three methyl<br>bromide     | 173 | 0.999<br>3 | 0.9985 |
| 33 | Carbon<br>disulfide               | 76  | 0.999<br>6 | 0.999<br>1 | 93    | styrene                     | 104 | 0.999<br>9 | 0.9992 |
| 34 | Trifluorotrichlo-<br>roethane     | 101 | 0.999<br>7 | 0.998<br>8 | 94    | tetrachloroethane           | 83  | 0.999<br>8 | 0.9978 |
| 35 | 2, 2-<br>dimethylbutane           | 57  | 0.999<br>3 | 0.998<br>6 | 95    | o-xylene                    | 91  | 0.999<br>9 | 0.9991 |
| 36 | Methylacrolein                    | 70  | 0.997<br>8 | 0.998<br>7 | 96    | Isnonane                    | 57  | 0.999<br>9 | 0.9997 |
| 37 | Tr-1, 2-<br>dichloroethylen-<br>e | 61  | 0.999<br>8 | 0.998<br>5 | 97    | Isopropyl<br>benzene        | 105 | 1.000<br>0 | 0.9994 |
| 38 | 1, 1-<br>dichloroethane           | 63  | 0.999<br>8 | 0.998<br>1 | 98    | benzaldehyde                | 106 | 0.994<br>8 | 0.9986 |
| 39 | cyclopentane                      | 70  | 0.999<br>2 | 0.999<br>0 | 99    | Normal propyl<br>benzene    | 91  | 1.000<br>0 | 0.9995 |

|    |                           |    |        |        |     |                         |     |        |        |
|----|---------------------------|----|--------|--------|-----|-------------------------|-----|--------|--------|
| 40 | Methyl tert-butyl ether   | 73 | 0.9975 | 0.9992 | 100 | M-ethyl toluene         | 105 | 0.9999 | 0.9994 |
| 41 | 2,3-Dimethylbutane        | 43 | 0.9997 | 0.9988 | 101 | Para-ethyl toluene      | 105 | 0.9999 | 0.9995 |
| 42 | Vinyl acetate             | 43 | 0.9994 | 0.9968 | 102 | 1,3, 5-trimethylbenzene | 105 | 0.9999 | 0.9996 |
| 43 | 2-methylpentane           | 71 | 0.9997 | 0.9984 | 103 | O-ethyl toluene         | 105 | 0.9999 | 0.9992 |
| 44 | N-butyl aldehyde          | 44 | 0.9989 | 0.9952 | 104 | 1,2, 4-trimethylbenzene | 105 | 0.9999 | 0.9996 |
| 45 | 2 - butanone              | 43 | 0.9992 | 0.9983 | 105 | Isdecane                | 57  | 0.9998 | 0.9979 |
| 46 | 3-methylpentane           | 57 | 0.9996 | 0.9989 | 106 | Chlorinated toluene     | 91  | 0.9894 | 0.9994 |
| 47 | 1 - hexene                | 56 | 0.9996 | 0.9988 | 107 | 1, 3 - dichlorobenzene  | 146 | 0.9998 | 0.9993 |
| 48 | Cis-1, 2-dichloroethylene | 61 | 0.9998 | 0.9989 | 108 | 1, 4 - dichlorobenzene  | 146 | 0.9997 | 0.9993 |
| 49 | Ethyl acetate             | 61 | 0.9992 | 0.9951 | 109 | 1,2, 3-trimethylbenzene | 105 | 0.9999 | 0.9995 |
| 50 | n-hexane                  | 57 | 0.9999 | 0.9988 | 110 | 1, 2 - Dichlorobenzene  | 146 | 0.9999 | 0.9997 |
| 51 | chloroform                | 83 | 0.9999 | 0.9985 | 111 | m-Diethylbenzene        | 105 | 0.9999 | 0.9995 |
| 52 | tetrahydrofuran           | 42 | 0.9965 | 0.9955 | 112 | p-diethylbenzene        | 105 | 0.9999 | 0.9997 |
| 53 | Crotonaldehyde            | 70 | 0.9961 | 0.9958 | 113 | m-methylbenzaldehyde    | 120 | 0.9995 | 0.9914 |
| 54 | 1, 2-dichloroethane       | 62 | 0.9999 | 0.9986 | 114 | Is undecane             | 57  | 0.9999 | 0.9978 |
| 55 | Methylcyclopentane        | 69 | 0.9962 | 0.9987 | 115 | 1, 4-trichlorobenzene   | 180 | 0.9998 | 0.9998 |
| 56 | 2, 4-dimethylpentane      | 57 | 0.9999 | 0.9989 | 116 | Fodecanoic              | 57  | 1.0000 | 0.9996 |
| 57 | 1,1, 1-trichloroethane    | 97 | 0.9996 | 0.9992 | 117 | Naphthalene             | 128 | 0.9998 | 0.9963 |
| 58 | Benzene                   | 78 | 0.9999 | 0.9967 | 118 | Hexachlorobutadiene     | 225 | 0.9999 | 0.9999 |

|    |                         |     |            |            |  |
|----|-------------------------|-----|------------|------------|--|
| 59 | Carbon<br>tetrachloride | 117 | 0.999<br>4 | 0.999<br>1 |  |
|----|-------------------------|-----|------------|------------|--|
